# Supplementary material
Source: Springer Nature journal article supplement (https://www.springerprofessional.de/resource/supplementary/13638_2014_1059_MOESM20_ESM.pdf/11898896)

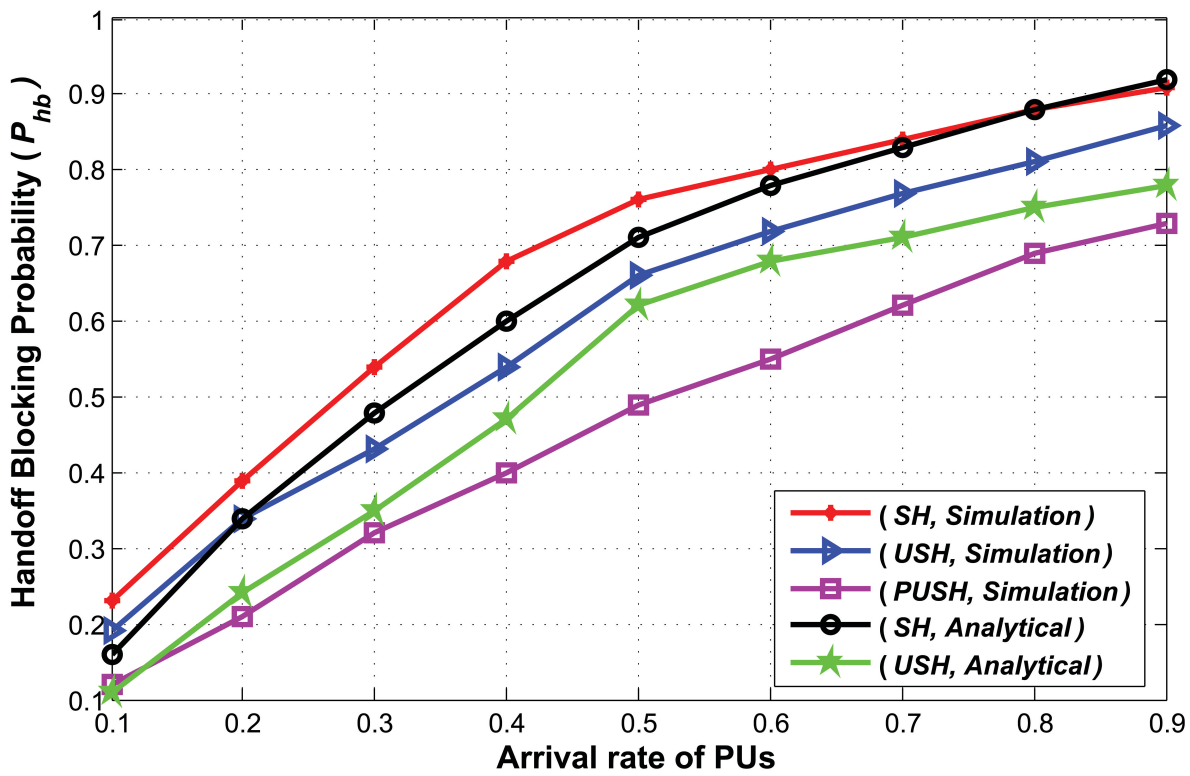

Supplement: MOESM20 [file 11898896]
